# Supplementary material for: The effects of rational and irrational beliefs on brain response to emotional scenarios: An fMRI study
Source: Research Square preprint supplement (doi:10.21203/rs.3.rs-7875472/v1), 2025-12-04
Supplement: Supplementary file 1 [file 3cd8fa139515e76af92c16ed.docx]

Supplementary Table 1. The negative scenarios presented to the participants

| **No.** | **The negative scenario presented to the participants** |
| --- | --- |
| 1. | *Imagine you were supposed to meet your boyfriend/girlfriend and he/she didn’t show up. It is already an hour late. You get a call from his/her mother telling you he/she has been involved in a serious car accident and is in a coma, with very little chances of survival.* |
| 2. | *Imagine you pass by your favorite coffee place on your way home. Through the window you see your boyfriend/girlfriend sitting at one of the tables, with a good looking girl/guy. They are kissing passionately. Your boyfriend/girlfriend had told you he/she has to stay home and study that day.* |
| 3. | *Imagine you have a very important exam tomorrow. If you don’t pass it, you cannot graduate this year. You have to wait another year to take it again. It is a hard exam that covers many subjects. You have studied for it, but there are some chapters you haven’t had time to read at all.* |
| 4. | *Imagine that one of your friends has not paid his university tax and will be expelled if he doesn’t. He asks you to lend him the money for a few days. You give him your rent money, saying you want it back as soon as possible. He doesn’t give you back the money after a few days, nor answers your calls. One of your mutual friends tells you he lost the money and that’s why he is not answering.* |
| 5. | *Imagine you were supposed to meet up with your friends in the center. When you get there, there is nobody. It is heavily raining and you don’t have an umbrella. You wait for 15 minutes and still nobody shows up. Nobody called you or sent you a message letting you know of any change of plans. You call one of your friends and he tells you they cancelled the meeting, but forgot to tell you.* |
| 6. | *Imagine it’s your birthday. Evening has already come and a lot of people have called you or sent you messages to congratulate you. The only one who hasn’t congratulated you, much less give you a present, up until now is your boyfriend/girlfriend. You spoke today and yet he/she said nothing about it.* |
| 7. | *Imagine your mother tells you she has found a suspiciously looking nodule at one of her breasts. She has to go to the doctor to have it checked. The doctor tells her it is most likely cancerous. He tells her she has to get surgery to have it removed.* |
| 8. | *Imagine you are taking an important admission exam. The questions are multiple choice and you have been warned not to make a move toward any of your colleagues. You notice the colleague behind you keeps peaking at your answer sheet. After this repeats several times, you turn to tell him to stop. The supervisor sees you and sends you out, canceling your exam.* |
| 9. | *Imagine you have an important project to turn in for one of the most important courses at the university. You work very hard for it and it takes up a lot of your time. The evening before turning it in, a friend asks you to give it to her just to have a look at the structure. You agree and the next day, you discovered she copied great parts of your project. When the scores for the projects get in, she has a bigger grade than you.* |
| 10. | *Imagine it is the last day when you can turn in your dissertation at the administrative offices to be enlisted for your diploma exam. You want to print the document with the final version, which you finished yesterday evening. You open the computer, find the document with the final version, but it is corrupted and cannot be opened or retrieved anymore.* |
| 11. | *Imagine you are dating a girl/guy you really like. She/he didn’t go to university, but is instead working to support herself/himself. Your parents disagree with this relationship and keep telling you she/he is not right for you and will impede you in your future. You fight with them about it and they threaten to not give any more money if you don’t break up with him/her.* |
| 12. | *Imagine you tell a friend a secret you kept very well hidden so far. It’s about a common friend that you like a lot, but who is involved with somebody else. A few days later, you accidentally hear your friend telling the common friend and his/her partner about this. They are all making fun of you.* |
| 13. | *Imagine you just got a new car as a present from your parents. Your best friend asks you to let him take it for a short ride. He pleads with you and insists so much that you agree. He said he will be back in 10 minutes. An hour has passed and he is not back. He calls you to tell you he had an accident and the car is in bad shape.* |
| 14. | *Imagine you and your friends have planned a road trip around Europe. It seems like it’s going to be a lot of fun, all your friends are going and you are really looking forward to it. The day before the trip you fall and hurt your hand. You go to the doctor who says you actually fractured it. You have to keep it immobilized and can’t take the trip anymore.* |
| 15. | *Imagine that you have just been invited to interview for a job you really wanted after several difficult interviews for the same position. The fact that you've made it this far means that you'll definitely be hired. Unfortunately on the way to the company you miss the bus, which is why you don't get to the final interview, to negotiate and sign the employment contract and therefore lose your hard-won position.* |
